# Supplementary material
Source: MDPI journal article supplement (https://www.mdpi.com/2077-0472/11/3/214)
Supplement: s1 [file s1]

## Supplementary material for

### **Pasture-based livestock economics under joint production of commodities and private amenity self-consumption: testing in large non-industrial privately-owned *dehesa* case studies in Andalusia-Spain**

Pablo Campos<sup>\*,1</sup>, Bruno Mesa<sup>1</sup> and Alejandro Álvarez<sup>1</sup>

<sup>1</sup>Spanish National Research Council (CSIC)-Institute for Public Goods and Policies (IPP).

\*Corresponding author: pablo.campos@csic.es. Tel.: +34-91-602-2535. Spanish National Research Council (CSIC)-Institute of Public Goods and Policies (IPP), C/ Albasanz, 26-28. E-28037 Madrid, Spain.

This file includes:

|                             |   |
|-----------------------------|---|
| Supplementary text S1       | 2 |
| Supplementary tables S1-S10 | 4 |

**Supplementary texts for**

**Pasture-based livestock economics under joint production of commodities and private amenity self-consumption: testing in large non-industrial privately-owned *dehesa* case studies in Andalusia-Spain**

**List of contents:**

**S1. Estimation of capital of building and equipment per livestock species..... 3**

**References..... 3**

### S1. Estimation of capital of building and equipment per livestock species

In [21], the livestock species with which the building and equipment capital (inanimate capital) is associated is not described in all cases, instead indicating its general purpose for use in the livestock farming activity. To estimate the distribution of the building and equipment capital per livestock species, in these case studies we firstly calculated a coefficient  $\omega_i$  based on the total forage units<sup>1</sup> consumed by each of the livestock species  $i$  in each of the studied farms according to eq. ST1.

$$\omega_{i,j} = \frac{FU_{i,j}}{FU_{Total,j}} \quad (\text{eq. ST1})$$

Where  $\omega_{i,j}$  is the coefficient for species  $i$  on farm  $j$ ,  $FU_{i,j}$  are the forage units consumed by species  $i$  on farm  $j$  and  $FU_{Total,j}$  are the total forage units consumed by all the livestock on farm  $j$ .

Based on coefficient  $\omega_{i,j}$  it is possible to estimate the opening capital of buildings ( $Cig_{co,i}$ ) and equipment ( $Cig_{e,i}$ ) associated with livestock species  $i$  through the product between this coefficient and the total capital of constructions ( $Cig_{co}$ ) or equipment ( $Cig_e$ ) destined to the livestock activity (eq. ST2 and eq. ST3, respectively). This same criterion is used for inputs, withdrawals, closing capital, revaluation and consumption of fixed capital.

$$Cig_{co,i} = \omega_{i,j} \cdot Cig_{co} \quad (\text{eq. ST2})$$

$$Cig_{e,i} = \omega_{i,j} \cdot Cig_e \quad (\text{eq. ST3})$$

### References

18. INRA. *Principes de la nutrition et de l'alimentation des ruminants; besoins alimentaires des animaux, valeur nutritive des aliments*. Institut National De La Recherche Agronomique, Versailles, France, 1978; p. 597.
21. Ovando, P.; Campos, P.; Mesa, B.; Álvarez, A.; Fernández, C.; Oviedo, J.L.; Caparrós, A.; Álvarez-Farizo, B. Renta y capital de estudios de caso de fincas agroforestales de Andalucía. In *Renta Total y Capital de las Fincas Agroforestales de Andalucía*; Campos, P., Ovando, P., Eds.; Memorias científicas de RECAMAN; Memoria 4.2; Editorial CSIC: Madrid, Spain, 2015; Volume 4, pp. 156–445. Available online: [http://libros.csic.es/product\\_info.php?products\\_id=990](http://libros.csic.es/product_info.php?products_id=990) (accessed on 27 April 2018).
23. MAPA. *Red contable agraria nacional (metodología) España*. Secretaría General Técnica. Ministerio de Agricultura, Pesca y Alimentación: Madrid, Spain, 2010, 9 p. Available online: [https://www.mapa.gob.es/es/estadistica/temas/estadisticas-agrarias/RECAN\\_Notas\\_Explicativas\\_tcm30-122480.pdf](https://www.mapa.gob.es/es/estadistica/temas/estadisticas-agrarias/RECAN_Notas_Explicativas_tcm30-122480.pdf) (accessed on 8 February 2021)

---

<sup>1</sup> Forage unit: refers to the energy content of a kilogram of barley with a humidity content of 14.1% and totals 2,723 kcal [18].

## Supplementary tables for

**Pasture-based livestock economics under joint production of commodities and private amenity self-consumption: testing in large non-industrial privately-owned *dehesa* case studies in Andalusia-Spain**

**Table S1.** Livestock races by species on large privately-owned *dehesa* case studies in Andalusia (2010).

| Dehesa    | Cattle                                                                                                | Sheep                                   | Goats                                     | Pigs                                      | Horses                                                                     |
|-----------|-------------------------------------------------------------------------------------------------------|-----------------------------------------|-------------------------------------------|-------------------------------------------|----------------------------------------------------------------------------|
| Dehesa 1  | Fighting bulls                                                                                        |                                         |                                           |                                           | Andalusian, <i>Hispano-Árabe</i> , mules and unspecified half-breed horses |
| Dehesa 2  | <i>Retinta</i> , <i>Charolais</i> , <i>Limousin</i> and half-breed cattle                             |                                         |                                           |                                           | Unspecified half-breed horses                                              |
| Dehesa 3  | <i>Retinta</i> , <i>Charolais</i> and <i>Limousin</i>                                                 |                                         |                                           |                                           | Andalusian                                                                 |
| Dehesa 4  | <i>Charolais</i> , <i>Limousin</i> and half-breed cattle                                              |                                         |                                           | <i>Iberico</i>                            |                                                                            |
| Dehesa 5  |                                                                                                       |                                         |                                           | <i>Iberico</i>                            |                                                                            |
| Dehesa 6  | <i>Retinta</i> , <i>Limousin</i> and Fighting bulls                                                   |                                         |                                           | <i>Iberico Negro entrepelado</i>          | Andalusian and unspecified half-breed horses                               |
| Dehesa 7  |                                                                                                       | <i>Segureña</i>                         |                                           | <i>Iberico Negro entrepelado</i>          |                                                                            |
| Dehesa 8  |                                                                                                       | <i>Segureña</i>                         | Unspecified half-breed goats              |                                           |                                                                            |
| Dehesa 9  |                                                                                                       | <i>Segureña</i>                         | <i>Granaina</i> and <i>Malagueña</i>      |                                           |                                                                            |
| Dehesa 10 | <i>Charolais</i> and half-breed cattle                                                                |                                         |                                           |                                           | Andalusian, mule and Anglo-Arabian with Andalusian                         |
| Dehesa 11 | Unspecified half-breed cattle                                                                         | <i>Merina de Grazalema</i>              | <i>Murciano-Granadina</i>                 | <i>Iberico Negro lampiño del guadiana</i> |                                                                            |
| Dehesa 12 |                                                                                                       | <i>Ile de France</i> with <i>Merina</i> |                                           | <i>Iberico Negro lampiño del guadiana</i> |                                                                            |
| Dehesa 13 | <i>Retinta</i> , <i>Charolais</i> , <i>Limousin</i> and half-breed cattle                             |                                         |                                           | <i>Iberico</i>                            | Anglo-Arabian                                                              |
| Dehesa 14 | <i>Berrenda en negro</i>                                                                              | <i>Segureña</i>                         | <i>Blanca andaluza</i> and <i>Serrana</i> |                                           | Unspecified half-breed horses, unspecified half-breed donkeys and ponys    |
| Dehesa 15 |                                                                                                       |                                         | <i>Malagueña</i>                          |                                           |                                                                            |
| Dehesa 16 | <i>Simmenthal-fleckvieh</i>                                                                           |                                         |                                           |                                           |                                                                            |
| Dehesa 17 |                                                                                                       |                                         |                                           |                                           | Unspecified half-breed horses                                              |
| Dehesa 18 | <i>Retinta</i> , <i>Limousin</i> and half-breed cattle                                                |                                         |                                           |                                           |                                                                            |
| Dehesa 19 | <i>Retinta</i> , <i>Berrenda colorada</i> , <i>Berrenda en negro</i> , <i>Limousin</i> and half-breed | <i>Merina</i> half-breed                |                                           | <i>Iberico</i> with Duroc                 |                                                                            |
| Dehesa 20 | Unspecified half-breed cattle                                                                         |                                         | Unspecified half-breed goats              | <i>Iberico</i> with Duroc                 |                                                                            |
| Dehesa 21 |                                                                                                       | Unspecified half-breed sheep            |                                           | <i>Iberico</i> with Duroc                 |                                                                            |

**Table S2.** Meat cattle physical indicators of large privately-owned *dehesa* case studies in Andalusia (2010).

| Dehesa    | Number of<br>livestock species<br>(n) | Female<br>breeders<br>(fb) | Births<br>(he/fb) | Sales<br>(he/fb) | Labor<br>(AWU) |               |       | Fodder consumption<br>(%) |             |       |
|-----------|---------------------------------------|----------------------------|-------------------|------------------|----------------|---------------|-------|---------------------------|-------------|-------|
|           |                                       |                            |                   |                  | Employee       | Self-employed | Total | Grazing                   | Supplements | Total |
| Dehesa 2  | 2                                     | 73                         | 0.7               | 0.6              | 0.9            |               | 0.9   | 85.2                      | 14.8        | 100.0 |
| Dehesa 3  | 2                                     | 132                        | 0.3               | 0.5              | 1.6            |               | 1.6   | 0.0                       | 100.0       | 100.0 |
| Dehesa 4  | 2                                     | 89                         | 0.8               | 0.3              | 0.9            |               | 0.9   | 60.3                      | 39.7        | 100.0 |
| Dehesa 6  | 4                                     | 130                        | 1.0               | 1.0              | 2.0            |               | 2.0   | 72.6                      | 27.4        | 100.0 |
| Dehesa 10 | 2                                     | 28                         | 0.6               | 0.5              | 0.1            |               | 0.1   | 77.0                      | 23.0        | 100.0 |
| Dehesa 11 | 4                                     | 38                         | 0.6               | 1.0              | 0.7            |               | 0.7   | 48.7                      | 51.3        | 100.0 |
| Dehesa 13 | 3                                     | 66                         | 0.7               | 0.3              | 1.1            | 0.0           | 1.1   | 75.4                      | 24.6        | 100.0 |
| Dehesa 14 | 4                                     | 7                          | 0.6               |                  | 0.1            | 0.0           | 0.1   | 95.6                      | 4.4         | 100.0 |
| Dehesa 16 | 1                                     | 16                         | 0.4               |                  | 0.2            |               | 0.2   | 94.2                      | 5.8         | 100.0 |
| Dehesa 18 | 1                                     | 83                         | 0.7               | 0.3              | 1.7            |               | 1.7   | 67.0                      | 33.0        | 100.0 |
| Dehesa 19 | 3                                     | 87                         |                   | 0.4              | 0.1            | 0.1           | 0.2   | 88.7                      | 11.3        | 100.0 |
| Dehesa 20 | 3                                     | 64                         | 0.6               | 0.6              |                | 1.3           | 1.3   | 87.3                      | 12.7        | 100.0 |

Source: Own elaboration.

Abbreviations: n is the number of livestock species with presence for more than 6 months at year; he are the livestock heads of this specie; fb are female breeders; AWU is annual work unit.

Notes: Annual work unit is equivalent to 1,826 hours worked per year [23].

**Table S3.** Fighting bulls physical indicators of large privately-owned *dehesa* case studies in Andalusia (2010).

| Dehesa   | Number of<br>livestock species<br>(n) | Female<br>breeders<br>(fb) | Births<br>(he/fb) | Sales<br>(he/fb) | Labor<br>(AWU) |               |       | Fodder consumption<br>(%) |             |       |
|----------|---------------------------------------|----------------------------|-------------------|------------------|----------------|---------------|-------|---------------------------|-------------|-------|
|          |                                       |                            |                   |                  | Employee       | Self-employed | Total | Grazing                   | Supplements | Total |
| Dehesa 1 | 2                                     | 188                        | 0.6               | 0.7              | 9.0            |               | 9.0   | 47.6                      | 52.4        | 100.0 |
| Dehesa 6 | 4                                     | 229                        | 0.6               | 0.1              | 4.9            |               | 4.9   | 46.9                      | 53.1        | 100.0 |

*Source:* Own elaboration.

*Abbreviations:* n is the number of livestock species with presence for more than 6 months at year; he are the livestock heads of this specie; fb are female breeders; AWU is annual work unit.

*Notes:* Annual work unit is equivalent to 1,826 hours worked per year [23].

**Table S4.** Sheep physical indicators of large privately-owned *dehesa* case studies in Andalusia (2010).

| Dehesa    | Number of<br>livestock species<br>(n) | Female<br>breeders<br>(fb) | Births<br>(he/fb) | Sales<br>(he/fb) | Labor<br>(AWU) |               |       | Fodder consumption<br>(%) |             |       |
|-----------|---------------------------------------|----------------------------|-------------------|------------------|----------------|---------------|-------|---------------------------|-------------|-------|
|           |                                       |                            |                   |                  | Employee       | Self-employed | Total | Grazing                   | Supplements | Total |
| Dehesa 7  | 2                                     | 183                        | 0.5               | 0.5              | 0.5            |               | 0.5   | 75.5                      | 24.5        | 100.0 |
| Dehesa 8  | 2                                     | 690                        | 1.0               | 0.8              |                |               | 1.1   | 29.0                      | 71.0        | 100.0 |
| Dehesa 9  | 2                                     | 20                         | 1.3               | 1.3              |                |               | 0.1   | 3.7                       | 96.3        | 100.0 |
| Dehesa 11 | 4                                     | 89                         | 0.3               | 0.1              | 0.1            |               | 0.1   | 67.9                      | 32.1        | 100.0 |
| Dehesa 12 | 2                                     | 161                        | 1.2               | 1.3              | 0.3            |               | 0.5   | 72.0                      | 28.0        | 100.0 |
| Dehesa 14 | 4                                     | 544                        | 0.6               | 0.6              | 0.3            |               | 0.5   | 79.1                      | 20.9        | 100.0 |
| Dehesa 19 | 3                                     | 31                         | 0.3               | 0.7              | 0.0            |               | 0.0   | 100.0                     |             | 100.0 |
| Dehesa 21 | 2                                     | 1,279                      | 1.4               | 1.3              | 1.4            |               | 1.4   | 37.8                      | 62.2        | 100.0 |

*Source:* Own elaboration.

*Abbreviations:* n is the number of livestock species with presence for more than 6 months at year; he are the livestock heads of this specie; fb are female breeders; AWU is annual work unit.

*Notes:* Annual work unit is equivalent to 1,826 hours worked per year [23].

**Table S5.** Goats physical indicators of large privately-owned *dehesa* case studies in Andalusia (2010).

| Dehesa    | Number of<br>livestock species<br>(n) | Female<br>breeders<br>(fb) | Births<br>(he/fb) | Sales<br>(he/fb) | Labor<br>(AWU) |               |       | Fodder consumption<br>(%) |             |       |
|-----------|---------------------------------------|----------------------------|-------------------|------------------|----------------|---------------|-------|---------------------------|-------------|-------|
|           |                                       |                            |                   |                  | Employee       | Self-employed | Total | Grazing                   | Supplements | Total |
| Dehesa 8  | 2                                     | 19                         | 0.9               | 1.7              |                |               | 0.0   | 0.0                       | 29.0        | 71.0  |
| Dehesa 9  | 2                                     | 254                        | 1.2               | 1.0              |                |               | 2.5   | 2.5                       | 3.7         | 96.3  |
| Dehesa 11 | 4                                     | 231                        | 0.8               | 1.2              | 1.4            |               | 1.4   | 50.5                      | 49.5        | 100.0 |
| Dehesa 14 | 4                                     | 45                         | 0.4               |                  | 0.0            | 0.0           | 0.1   | 81.6                      | 18.4        | 100.0 |
| Dehesa 15 | 1                                     | 730                        | 1.0               | 0.5              | 2.5            |               | 2.5   | 5.1                       | 94.9        | 100.0 |
| Dehesa 20 | 3                                     | 353                        | 0.4               | 0.5              |                |               | 0.8   | 0.8                       | 82.0        | 18.0  |

*Source:* Own elaboration.

*Abbreviations:* n is the number of livestock species with presence for more than 6 months at year; he are the livestock heads of this specie; fb are female breeders; AWU is annual work unit.

*Notes:* Annual work unit is equivalent to 1,826 hours worked per year [23].

**Table S6.** *Montanera* Iberian pigs physical indicators of large privately-owned *dehesa* case studies in Andalusia (2010).

| Dehesa    | Number of<br>livestock species<br>(n) | Iberian pigs in<br><i>montanera</i><br>(he) | Labor<br>(AWU) |               |       | Fodder consumption<br>(%) |             |       |
|-----------|---------------------------------------|---------------------------------------------|----------------|---------------|-------|---------------------------|-------------|-------|
|           |                                       |                                             | Employee       | Self-employed | Total | Grazing                   | Supplements | Total |
| Dehesa 4  | 2                                     | 62                                          | 0.4            |               | 0.4   | 43.0                      | 57.0        | 100.0 |
| Dehesa 5  | 1                                     | 292                                         | 0.1            |               | 0.1   | 72.1                      | 27.9        | 100.0 |
| Dehesa 6  | 4                                     | 1,172                                       | 0.7            |               | 0.7   | 45.3                      | 54.7        | 100.0 |
| Dehesa 11 | 4                                     | 132                                         | 0.4            |               | 0.4   | 25.5                      | 74.5        | 100.0 |
| Dehesa 12 | 2                                     | 97                                          | 0.5            | 0.3           | 0.8   | 27.4                      | 72.6        | 100.0 |
| Dehesa 13 | 3                                     | 143                                         | 1.4            | 0.0           | 1.4   | 5.4                       | 94.6        | 100.0 |
| Dehesa 19 | 3                                     | 182                                         | 2.2            | 0.3           | 2.5   | 4.2                       | 95.8        | 100.0 |
| Dehesa 20 | 3                                     | 13                                          |                | 0.0           | 0.0   | 91.3                      | 8.7         | 100.0 |
| Dehesa 21 | 2                                     | 665                                         | 1.8            |               | 1.8   | 42.7                      | 57.3        | 100.0 |

*Source:* Own elaboration.

*Abbreviations:* n is the number of livestock species with presence for more than 6 months at year; he are the livestock heads of this specie; AWU is annual work unit.

*Notes:* Annual work unit is equivalent to 1,826 hours worked per year [23].

**Table S7.** *Montanera* Iberian pigs grazing season on large privately-owned *dehesa* case studies in Andalusia (2010).

| Dehesa     | Weight of Iberian pigs in<br><i>montanera</i> (arrobas <sup>(1)</sup> /he) |                                    | Grazing<br>consumption<br>(FU/he<br>per day) | <i>Montanera</i><br>period<br>(months) | Iberian pigs in<br><i>montanera</i><br>fattening<br>(he) |
|------------|----------------------------------------------------------------------------|------------------------------------|----------------------------------------------|----------------------------------------|----------------------------------------------------------|
|            | Entries in<br><i>montanera</i>                                             | Withdrawals of<br><i>montanera</i> |                                              |                                        |                                                          |
| Dehesa 4   | 10.1                                                                       | 14.6                               | 2.6                                          | 4                                      | 62                                                       |
| Dehesa 5   | 7.0                                                                        | 15.0                               | 2.8                                          | 5                                      | 292                                                      |
| Dehesa 6   | 9.5                                                                        | 14.2                               | 2.7                                          | 4                                      | 1,172                                                    |
| Dehesa 11  | 9.0                                                                        | 14.0                               | 2.9                                          | 4                                      | 132                                                      |
| Dehesa 12  | 9.0                                                                        | 14.0                               | 2.3                                          | 5                                      | 97                                                       |
| Dehesa 13  | 10.2                                                                       | 14.0                               | 2.2                                          | 4                                      | 143                                                      |
| Dehesa 19  | 7.2                                                                        | 9.3                                | 1.6                                          | 3                                      | 182                                                      |
| Dehesa 20  | 8.5                                                                        | 14.3                               | 2.4                                          | 5                                      | 13                                                       |
| Dehesa 21  | 9.0                                                                        | 14.5                               | 2.5                                          | 5                                      | 665                                                      |
| Mean value | 8.8                                                                        | 13.8                               | 2.5                                          | 4                                      | 306                                                      |

Source: Own elaboration.

Abbreviations: FU is forage units; he are livestock heads of this specie.

Notes: <sup>(1)</sup> 1 arroba is 11.5 kilograms.

**Table S8.** Extensive piglets physical indicators of a large privately-owned *dehesa* case study in Andalusia (2010).

| Dehesa   | Number of<br>livestock species<br>(n) | Sales<br>(he) | Labor<br>(AWU) |               |       | Fodder consumption<br>(%) |             |       |
|----------|---------------------------------------|---------------|----------------|---------------|-------|---------------------------|-------------|-------|
|          |                                       |               | Employee       | Self-employed | Total | Grazing                   | Supplements | Total |
| Dehesa 7 | 2                                     | 93            | 0.6            |               | 0.6   | 15.7                      | 84.3        | 100.0 |

*Source:* Own elaboration.

*Abbreviations:* n is the number of livestock species with presence for more than 6 months at year; he are the livestock heads of this specie; AWU is annual work unit.

*Notes:* Annual work unit is equivalent to 1,826 hours worked per year [23].

**Table S9.** Horses physical indicators of large privately-owned *dehesa* case studies in Andalusia (2010).

| Dehesa    | Number of<br>livestock species<br>(n) | Breeder<br>(he) | Labor<br>(AWU) |               |       | Fodder consumption<br>(%) |             |       |
|-----------|---------------------------------------|-----------------|----------------|---------------|-------|---------------------------|-------------|-------|
|           |                                       |                 | Employee       | Self-employed | Total | Grazing                   | Supplements | Total |
| Dehesa 1  | 2                                     | 14              | 0.1            |               | 0.1   |                           | 100.0       | 100.0 |
| Dehesa 2  | 2                                     | 3               | 0.0            |               | 0.0   | 71.3                      | 28.7        | 100.0 |
| Dehesa 3  | 2                                     | 68              | 5.3            |               | 5.3   | 14.8                      | 85.2        | 100.0 |
| Dehesa 6  | 4                                     | 37              | 1.1            |               | 1.1   |                           | 100.0       | 100.0 |
| Dehesa 10 | 2                                     | 11              | 1.0            |               | 1.0   |                           | 100.0       | 100.0 |
| Dehesa 13 | 3                                     | 2               | 0.1            | 0.0           | 0.1   | 75.6                      | 24.4        | 100.0 |
| Dehesa 14 | 4                                     | 7               | 0.0            | 0.0           | 0.0   | 87.8                      | 12.2        | 100.0 |
| Dehesa 17 | 1                                     | 150             | 0.2            |               | 0.2   | 45.8                      | 54.2        | 100.0 |

Source: Own elaboration.

Abbreviations: n is the number of livestock species with presence for more than 6 months at year; he are the livestock heads of this specie; AWU is annual work unit.

Notes: Annual work unit is equivalent to 1,826 hours worked per year [23].

**Table S10.** Bees physical indicators of large privately-owned *dehesa* case studies in Andalusia (2010).

| Dehesa    | Hives<br>(hi) | Honey<br>(kg/hive) | Labor<br>(AWU) |               | Total |
|-----------|---------------|--------------------|----------------|---------------|-------|
|           |               |                    | Employee       | Self-employed |       |
| Dehesa 2  | 80            | 0.3                |                | 0.1           | 0.1   |
| Dehesa 11 | 20            | 4.2                |                | 0.0           | 0.0   |
| Dehesa 14 | 160           | 12.9               | 0.0            | 0.7           | 0.8   |
| Dehesa 16 | 80            | 15.9               |                | 0.2           | 0.2   |
| Dehesa 21 | 350           | 15.4               |                | 0.2           | 0.2   |

*Source:* Own elaboration.

*Abbreviations:* hi is the number of bee hives; AWU is annual work unit.

*Notes:* Annual work unit is equivalent to 1,826 hours worked per year [23].
